# Supplementary material for: O,S-Heterocyclic stannylenes: synthesis and reactivity
Source: Royal Society of Chemistry journal article supplement (doi:10.1039/c6dt01013j), 2016-01-01
Supplement: c6dt01013j1.pdf [file c6dt01013j1.pdf]

*Supporting Information*

# ***O,S*-Heterocyclic Stannylenes: Synthesis and Reactivity**

*Surendar Karwasara, Chandan Kumar Jha, Soumen Sinhababu, and Selvarajan Nagendran\**

Department of Chemistry, Indian Institute of Technology Delhi, Hauz Khas, New Delhi 110 016,  
India

| Content                                                                                                                                                                                           | Page No. |
|---------------------------------------------------------------------------------------------------------------------------------------------------------------------------------------------------|----------|
| <b>Experimental Section</b>                                                                                                                                                                       | S2       |
| <b>Figure S1.</b> Molecular structure of compound <b>7</b> (left) and coordination environment around tin atom in compound <b>7</b> (right)                                                       | S5       |
| <b>Figure S2.</b> <sup>1</sup> H NMR spectrum of compound <b>2</b> in: (1) Dry CDCl <sub>3</sub> , (2) Normal CDCl <sub>3</sub> after 24 h, and (3) Normal CDCl <sub>3</sub> and D <sub>2</sub> O | S6       |
| <b>Figure S3.</b> Molecular structure of compound <b>3</b>                                                                                                                                        | S7       |
| <b>Figure S4.</b> Molecular structure of compound <b>6</b>                                                                                                                                        | S7       |
| <b>Figure S5.</b> Molecular orbitals of compounds <b>2</b> (4.1a-b), <b>3</b> (4.2a-b), and <b>5</b> (4.3a-b)                                                                                     | S8       |
| <b>X-ray data collection for compounds 2-7</b>                                                                                                                                                    | S9       |
| <b>Table S1.</b> Crystal data and refinement parameters for compounds <b>2-7</b>                                                                                                                  | S10      |
| <b>Computational details</b>                                                                                                                                                                      | S11      |
| Coordinates of the optimized geometries of compounds <b>2</b> , <b>3</b> , and <b>5</b>                                                                                                           | S11      |
| <b>References</b>                                                                                                                                                                                 | S14      |

## Experimental Section

All the air and moisture sensitive manipulations were done under a dry N<sub>2</sub> atmosphere using either standard Schlenk or glovebox [Jacomex (GP Concept)-T2 workstation] techniques. Tetrahydrofuran was dried over sodium wire and benzophenone. Dichloromethane and CDCl<sub>3</sub> were dried over P<sub>2</sub>O<sub>5</sub> and 4 Å molecular sieves, respectively. SnCl<sub>2</sub> and InCl were purchased from Alfa Aesar and used as received. Sodium 2-mercaptopyridine-*N*-oxide, GeCl<sub>2</sub>·dioxane, and SbCl<sub>3</sub> were purchased from Aldrich and used as received. Melting points were recorded on a Unitech Sales digital melting point apparatus by sealing the compounds in glass capillaries. Elemental analyses were performed using a PerkinElmer CHN analyzer. <sup>1</sup>H, <sup>13</sup>C, and <sup>119</sup>Sn NMR spectra were recorded in CDCl<sub>3</sub>/DMSO-d<sub>6</sub> on a 300 MHz Bruker DPX-300/400 MHz JEOL NMR spectrometers. The chemical shifts  $\delta$  are reported in ppm and internally referenced with respect to residual solvent (<sup>1</sup>H NMR) and solvent (<sup>13</sup>C NMR) resonances.<sup>S1</sup> (CH<sub>3</sub>)<sub>4</sub>Sn was used as external reference for <sup>119</sup>Sn NMR spectroscopic studies.

**Synthesis of (2-mpno)<sub>2</sub>Sn (2).** To a stirred solution of SnCl<sub>2</sub> (500 mg, 2.64 mmol) in tetrahydrofuran (150 mL) was added sodium 2-mpno (787 mg, 5.27 mmol) in portions at room temperature and the reaction mixture was further stirred for 24 h. Then, the reaction mixture was filtered through a sintered funnel with celite. All the volatiles were removed from the filtrate under reduced pressure to give compound **2** as a white solid. The diffusion of hexane in the tetrahydrofuran solution of compound **2** afforded single-crystals suitable for X-ray diffraction studies. Yield: 950 mg (2.56 mmol, 97%). Mp: 148 °C (decomp). Anal. Calcd for C<sub>10</sub>H<sub>8</sub>N<sub>2</sub>O<sub>2</sub>S<sub>2</sub>Sn (*M* = 371.02): C, 32.37; H, 2.17; N, 7.55. Found: C, 32.43; H, 2.19; N, 7.51. <sup>1</sup>H NMR (300 MHz, CDCl<sub>3</sub>):  $\delta$  6.86 (t, <sup>3</sup>*J*<sub>HH</sub> = 6.9 Hz, 1H, *CH*), 7.15 (t, <sup>3</sup>*J*<sub>HH</sub> = 7.5 Hz, 8.1 Hz, 1H, *CH*), 7.55 (d, <sup>3</sup>*J*<sub>HH</sub> = 8.1 Hz, 1H, *CH*), 8.14 (d, <sup>3</sup>*J*<sub>HH</sub> = 6.6 Hz, 1H, *CH*). <sup>13</sup>C{<sup>1</sup>H} NMR (75 MHz,

$\text{CDCl}_3$ ):  $\delta$  117.90 (CH), 129.60 (CH), 129.94 (CH), 138.29 (CH), 159.08 (C).  $^{119}\text{Sn}\{^1\text{H}\}$  NMR (111.92 MHz,  $\text{CDCl}_3$ ):  $\delta$  -261.0.

**Synthesis of (2-mpno)SnCl (3).** To a stirred solution of  $\text{SnCl}_2$  (200 mg, 1.05 mmol) in tetrahydrofuran (100 mL) was added sodium salt of 2-mpno (157 mg, 1.05 mmol) in portions and the reaction mixture was stirred for 24 h. Then, the reaction mixture was filtered through a sintered funnel with celite. All the volatiles were removed from the filtrate under reduced pressure to give compound **3** as a white solid. The suitable single-crystals of compound **3** were obtained from its tetrahydrofuran solution by slow evaporation method. Yield: 283 mg (1.01 mmol, 96%). Mp: 202 °C. Anal. Calcd for  $\text{C}_5\text{H}_4\text{ClNOSSn}$  ( $M = 280.32$ ): C, 21.42; H, 1.44; N, 5.00. Found: C, 21.45; H, 1.43; N, 4.98.  $^1\text{H}$  NMR (400.13 MHz,  $\text{DMSO-D}_6$ ):  $\delta$  7.12 (t,  $^3J_{\text{HH}} = 6.0$  Hz, 1H, CH), 7.42 (t,  $^3J_{\text{HH}} = 6.0$  Hz, 1H, CH), 7.69 (d,  $^3J_{\text{HH}} = 6.0$  Hz, 1H, CH), 8.45 (d,  $^3J_{\text{HH}} = 6.0$  Hz, 1H, CH).  $^{13}\text{C}\{^1\text{H}\}$  NMR (100.63 MHz,  $\text{DMSO-D}_6$ ):  $\delta$  119.65 (CH), 129.52 (CH), 131.62 (CH), 139.20 (CH).  $^{119}\text{Sn}\{^1\text{H}\}$  NMR (111.92 MHz,  $\text{DMSO-D}_6$ ):  $\delta$  -288.6.

**Synthesis of [(2-mpno)SbCl] $_2$ O (4).** To a stirred solution of compound **2** (200 mg, 0.54 mmol) in tetrahydrofuran (80 mL) was added a solution of  $\text{SbCl}_3$  (123 mg, 0.54 mmol) in tetrahydrofuran (15 mL) and the reaction mixture was further stirred for 5 h. Then, the solvent was removed under reduced pressure to give a white residue. The residue was dissolved in dichloromethane and filtered through a sintered funnel with celite. All the volatiles were removed from the filtrate under reduced pressure to get an analytically pure sample of compound **4** as a white solid. Hexane diffusion in the tetrahydrofuran solution of compound **4** gave its suitable single-crystals. Yield: 140 mg (0.24 mmol, 89%). Mp: 207 °C. Anal. Calcd for  $\text{C}_{10}\text{H}_8\text{Cl}_2\text{N}_2\text{O}_3\text{S}_2\text{Sb}_2$  ( $M = 582.74$ ): C, 20.61; H, 1.38; N, 4.81. Found: C, 20.68; H, 1.39; N, 4.79.  $^1\text{H}$  NMR (300 MHz,  $\text{CDCl}_3$ ):  $\delta$  7.07 (broad, 1H, CH), 7.41 (t,  $^3J_{\text{HH}} = 7.5$  Hz, 7.2 Hz, 1H, CH),

7.69 (d,  $^3J_{\text{HH}} = 7.8$  Hz, 1H, CH), 8.24 (d,  $^3J_{\text{HH}} = 6.6$  Hz, 1H, CH).  $^{13}\text{C}\{^1\text{H}\}$  NMR (75 MHz,  $\text{CDCl}_3$ ):  $\delta$  132.45 (CH), 138.38 (CH).

**Synthesis of (2-mpno)GeCl (5).** To a stirred solution of compound **2** (100 mg, 0.27 mmol) in tetrahydrofuran (50 mL) was added a solution of  $\text{GeCl}_2 \cdot (1,4\text{-dioxane})$  (124mg, 0.54 mmol) in tetrahydrofuran (10 ml) and the reaction mixture was further stirred for 2 h. Then, the solvent was removed under reduced pressure to give a white residue. The residue was dissolved in dichloromethane and filtered through a sintered funnel with celite. All the volatiles were removed from the filtrate under reduced pressure to afford an analytically pure sample of compound **5** as a white solid. Tetrahydrofuran solution of compound **5** yielded its single-crystal through slow evaporation of the solvent. Yield: 61 mg (0.26 mmol, 96%). Mp: 134 °C (decomp). Anal. Calcd for  $\text{C}_5\text{H}_4\text{ClGeNOS}$  ( $M = 234.25$ ): C, 25.64; H, 1.72; N, 5.98. Found: C, 25.68; H, 1.72; N, 5.97.  $^1\text{H}$  NMR (300 MHz,  $\text{CDCl}_3$ ):  $\delta$  7.17 (t,  $^3J_{\text{HH}} = 6.9$  Hz, 6.2 Hz, 1H, CH), 7.58 (t,  $^3J_{\text{HH}} = 7.2$  Hz, 8.4 Hz, 1H, CH), 7.82 (d,  $^3J_{\text{HH}} = 8.4$  Hz, 1H, CH), 8.34 (d,  $^3J_{\text{HH}} = 6.6$  Hz, 1H, CH).  $^{13}\text{C}\{^1\text{H}\}$  NMR (75 MHz,  $\text{CDCl}_3$ ):  $\delta$  119.27 (CH), 128.39 (CH), 134.19 (CH), 137.31 (CH), 156.63 (C).

**Synthesis of (2-mpno)InCl·2thf (6).** To a stirred solution of compound **5** (100 mg, 0.36 mmol) in tetrahydrofuran (40 mL) was added InCl (54 mg, 0.36 mmol) in portions and the reaction mixture was stirred for 3 h. Then, the reaction mixture was filtered through a sintered funnel with celite. All the volatiles were removed from the filtrate under reduced pressure to give compound **6** as a white solid. Suitable single-crystals of compound **6** were obtained in a similar manner as in case of compound **5**. Yield: 155 mg (0.34 mmol, 95%). Mp: 217 °C (decomp). Anal. Calcd for  $\text{C}_{13}\text{H}_{20}\text{Cl}_2\text{InNO}_3\text{S}$  ( $M = 456.09$ ): C, 34.23; H, 4.42; N, 3.07. Found: C, 34.28; H, 4.45; N, 3.08.  $^1\text{H}$  NMR (300 MHz,  $\text{CDCl}_3$ ):  $\delta$  1.89-1.93 (m, 8H,  $\text{O}(\text{CH}_2\text{CH}_2)_2$ ), 3.90 (t,  $^3J_{\text{HH}} = 6.3$  Hz, 8H,

$\text{O}(\text{CH}_2\text{CH}_2)_2$ , 7.05-7.10 (m, 1H, CH), 7.39 (t,  $^3J_{\text{HH}} = 7.5$  Hz, 8.1 Hz, 1H, CH), 7.69-7.72 (m, 1H, CH), 8.51 (d,  $^3J_{\text{HH}} = 6.6$  Hz, 1H, CH).  $^{13}\text{C}\{^1\text{H}\}$  NMR (75 MHz,  $\text{CDCl}_3$ ):  $\delta$  25.58 ( $\text{O}(\text{CH}_2\text{CH}_2)_2$ ), 69.02 ( $\text{O}(\text{CH}_2\text{CH}_2)_2$ ), 119.45 (CH), 130.13 (CH), 132.15 (CH), 139.17 (CH), 157.01 (C).

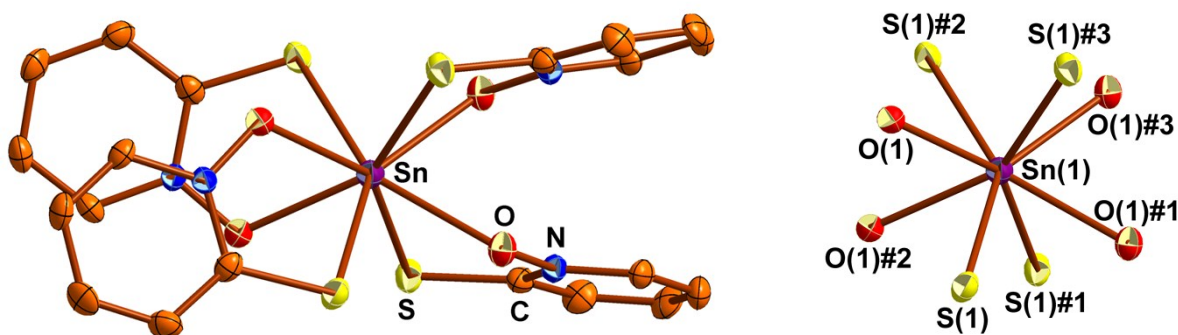

**Figure S1.** Molecular structure of compound **7** (left) and coordination environment around tin atom in compound **7** (right). Selected bond lengths ( $\text{\AA}$ ) and angles ( $^\circ$ ): Sn(1)-O(1) 2.383(5), Sn(1)-S(1) 2.540(2); O(1)-Sn(1)-S(1) 71.6(1), O(1)#2-Sn(1)-O(1) 76.1(2), O(1)#1-Sn(1)-O(1) 128.3(2), S(1)#1-Sn(1)-O(1) 147.0(1), S(1)#2-Sn(1)-O(1) 78.2(1), S(1)#3-Sn(1)-O(1) 71.4(1), S(1)#1-Sn(1)-S(1) 96.2(1), S(1)#2-Sn(1)-S(1) 141.5(1). Equivalent atoms (#) are symmetry ( $y, 1/2-x, 1/2-z$ ) generated.

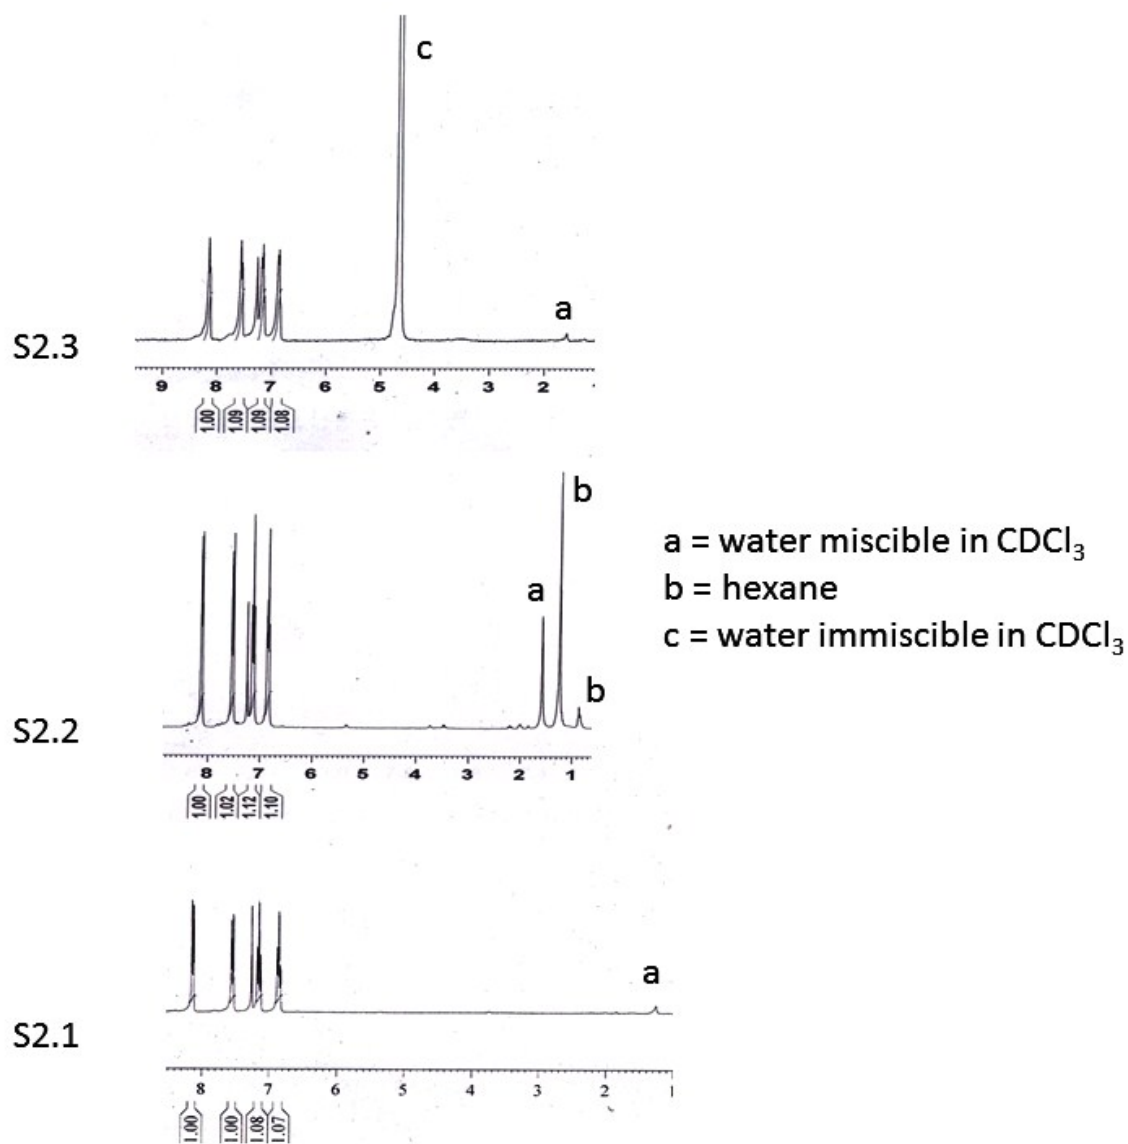

**Figure S2.**  $^1\text{H}$  NMR spectrum of compound **2** in: (1) Dry  $\text{CDCl}_3$ , (2) Normal  $\text{CDCl}_3$  after 24 h, and (3) Normal  $\text{CDCl}_3$  and  $\text{D}_2\text{O}$ .

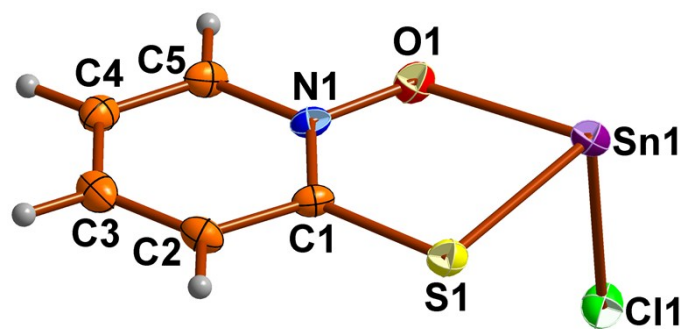

**Figure S3.** Molecular structure of compound **3**. Selected bond lengths (Å) and angles (°): Sn(1)-O(1) 2.181(4), Sn(1)-S(1) 2.547(2), Sn(1)-Cl(1) 2.567(2); O(1)-Sn(1)-S(1) 77.3(1), O(1)-Sn(1)-Cl(1) 91.2(1), S(1)-Sn(1)-Cl(1) 93.0(1).

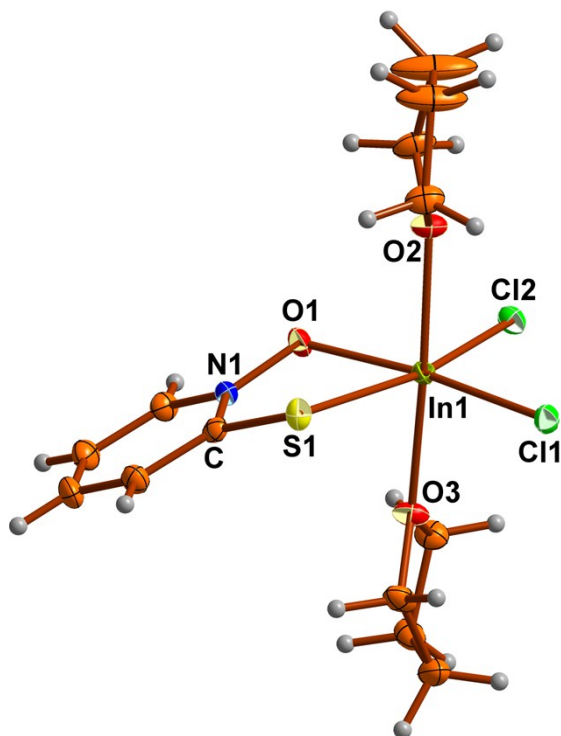

**Figure S4.** Molecular structure of compound **6**. Selected bond lengths (Å) and angles (°): In(1)-O(1) 2.174(2), In(1)-O(2) 2.277(2), In(1)-O(3) 2.262(2), In(1)-S(1) 2.530(1), In(1)-Cl(1) 2.428(1), In(1)-Cl(2) 2.417(1); O(1)-In(1)-S(1) 77.9(1), Cl(1)-In(1)-Cl(2) 99.9(1), O(1)-In(1)-Cl(2) 88.3(1), Cl(1)-In(1)-S(1) 94.0(1), O(3)-In(1)-O(2) 174.8(1).

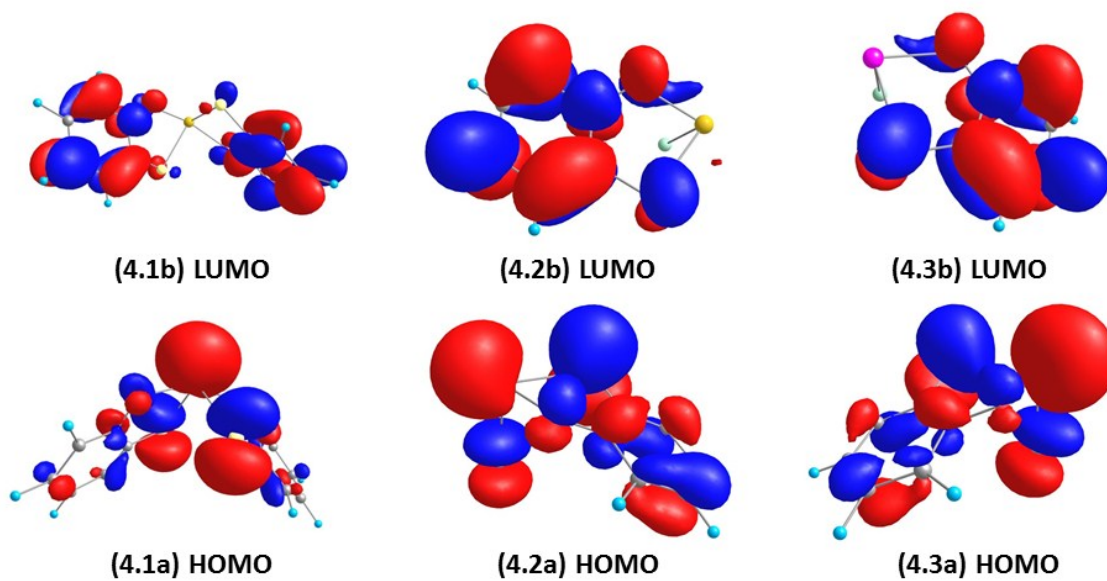

**Figure S5.** Molecular orbitals of compounds **2** (4.1a-b), **3** (4.2a-b), and **5** (4.3a-b).



**X-ray data collection for compounds 2-7**

Single crystals of compounds **2-7** were coated with a cryoprotectant and mounted on a glass fiber. The data were collected at low temperature on a Bruker SMART APEX CCD diffractometer with a 3-axis goniometer.<sup>S2</sup> SAINT and SADABS software were used for data integration and empirical absorption correction, respectively.<sup>S3</sup> The structures of these compounds were solved by direct methods and refined by full matrix least-squares on  $F^2$  using SHELXTL.<sup>S4</sup> All the non-hydrogen atoms were refined anisotropically. The positions of hydrogen atoms were calculated using a riding model and refined isotropically. Detailed crystallographic data for these compounds are given in Table S1.

**Table S1. Crystal data and refinement parameters for compounds 2-7**

|                                                        | <b>2</b>                                                                       | <b>4</b>                                                                                                    | <b>5</b>                                                           | <b>3</b>                                                              | <b>6</b>                                                            | <b>7</b>                                                                        |
|--------------------------------------------------------|--------------------------------------------------------------------------------|-------------------------------------------------------------------------------------------------------------|--------------------------------------------------------------------|-----------------------------------------------------------------------|---------------------------------------------------------------------|---------------------------------------------------------------------------------|
| empirical formula                                      | C <sub>10</sub> H <sub>8</sub> N <sub>2</sub> O <sub>2</sub> S <sub>2</sub> Sn | C <sub>10</sub> H <sub>8</sub> Cl <sub>2</sub> N <sub>2</sub> O <sub>3</sub> S <sub>2</sub> Sb <sub>2</sub> | C <sub>5</sub> H <sub>4</sub> ClGeNOS                              | C <sub>5</sub> H <sub>4</sub> ClNOSSn                                 | C <sub>13</sub> H <sub>20</sub> Cl <sub>2</sub> InNO <sub>3</sub> S | C <sub>20</sub> H <sub>16</sub> N <sub>4</sub> O <sub>4</sub> S <sub>4</sub> Sn |
| Fw                                                     | 371.01                                                                         | 582.72                                                                                                      | 234.21                                                             | 280.31                                                                | 456.08                                                              | 623.32                                                                          |
| temperature, k                                         | 150(2)                                                                         | 175(2)                                                                                                      | 100(2)                                                             | 150(2)                                                                | 100(2)                                                              | 200(2)                                                                          |
| wavelength, Å                                          | 0.71073                                                                        | 0.71073                                                                                                     | 0.71073                                                            | 0.71073                                                               | 0.71073                                                             | 0.71073                                                                         |
| cryst syst                                             | triclinic                                                                      | triclinic                                                                                                   | monoclinic                                                         | triclinic                                                             | monoclinic                                                          | Tetragonal                                                                      |
| space group                                            | <i>P</i> -1                                                                    | <i>P</i> -1                                                                                                 | <i>P</i> 2 <sub>1</sub> / <i>c</i>                                 | <i>P</i> -1                                                           | <i>P</i> 2 <sub>1</sub> / <i>c</i>                                  | <i>P</i> 4 <sub>2</sub> / <i>n</i>                                              |
| unit cell dimens                                       | <i>a</i> = 7.4019(10) Å                                                        | <i>a</i> = 9.4585(16) Å                                                                                     | <i>a</i> = 6.4885(19) Å                                            | <i>a</i> = 5.9142(14) Å                                               | <i>a</i> = 12.6099(16) Å                                            | <i>a</i> = 9.2261(11) Å                                                         |
|                                                        | <i>b</i> = 7.5564(10) Å                                                        | <i>b</i> = 10.3141(18) Å                                                                                    | <i>b</i> = 13.237(4) Å                                             | <i>b</i> = 7.4252(18) Å                                               | <i>b</i> = 9.8845(13) Å                                             | <i>b</i> = 9.2261(11) Å                                                         |
|                                                        | <i>c</i> = 11.4734(15) Å                                                       | <i>c</i> = 10.6648(18) Å                                                                                    | <i>c</i> = 9.119(3) Å                                              | <i>c</i> = 9.479(2) Å                                                 | <i>c</i> = 14.1146(17) Å                                            | <i>c</i> = 12.741(3) Å                                                          |
|                                                        | $\alpha$ = 88.006(2)°                                                          | $\alpha$ = 82.554(3)°                                                                                       |                                                                    | $\alpha$ = 79.270(4)°                                                 |                                                                     |                                                                                 |
|                                                        | $\beta$ = 74.539(2)°                                                           | $\beta$ = 64.039(3)°                                                                                        | $\beta$ = 102.608(5)°                                              | $\beta$ = 72.376(4)°                                                  | $\beta$ = 99.243(2)°                                                |                                                                                 |
|                                                        | $\gamma$ = 79.608(2)°                                                          | $\gamma$ = 63.591(3)°                                                                                       |                                                                    | $\gamma$ = 82.595(5)°                                                 |                                                                     |                                                                                 |
| volume, Å <sup>3</sup>                                 | 608.30(14)                                                                     | 835.1(2)                                                                                                    | 764.3(4)                                                           | 388.62(16)                                                            | 1736.4(4)                                                           | 1084.5(4)                                                                       |
| <i>Z</i>                                               | 2                                                                              | 2                                                                                                           | 4                                                                  | 2                                                                     | 4                                                                   | 2                                                                               |
| density (calcd),<br>Mg/m <sup>3</sup>                  | 2.026                                                                          | 2.317                                                                                                       | 2.035                                                              | 2.395                                                                 | 1.745                                                               | 1.909                                                                           |
| absorption<br>coefficient, mm <sup>-1</sup>            | 2.432                                                                          | 3.812                                                                                                       | 4.554                                                              | 3.825                                                                 | 1.796                                                               | 1.602                                                                           |
| <i>F</i> (000)                                         | 360.0                                                                          | 548.0                                                                                                       | 456.0                                                              | 264.0                                                                 | 912.0                                                               | 620.0                                                                           |
| cryst size, mm <sup>3</sup>                            | 0.438 x 0.355 x 0.299                                                          | 0.420 x 0.306 x 0.255                                                                                       | 0.476 x 0.402 x 0.353                                              | 0.449 x 0.357 x 0.275                                                 | 0.513 x 0.391 x 0.322                                               | 0.488 x 0.415 x 0.367                                                           |
| $\theta$ range for data<br>collection, deg             | 2.74 to 25.00                                                                  | 2.13 to 24.99                                                                                               | 2.76 to 24.99                                                      | 2.28 to 24.98                                                         | 2.63 to 25.00                                                       | 2.73 to 24.95                                                                   |
| limiting indices                                       | -8 ≤ <i>h</i> ≤ 8,<br>-8 ≤ <i>k</i> ≤ 8,<br>-13 ≤ <i>l</i> ≤ 13                | -11 ≤ <i>h</i> ≤ 11,<br>-12 ≤ <i>k</i> ≤ 12,<br>-12 ≤ <i>l</i> ≤ 12                                         | -7 ≤ <i>h</i> ≤ 7,<br>-15 ≤ <i>k</i> ≤ 15,<br>-10 ≤ <i>l</i> ≤ 10  | -7 ≤ <i>h</i> ≤ 7,<br>-8 ≤ <i>k</i> ≤ 8,<br>-11 ≤ <i>l</i> ≤ 11       | -14 ≤ <i>h</i> ≤ 14,<br>-9 ≤ <i>k</i> ≤ 11,<br>-13 ≤ <i>l</i> ≤ 16  | -10 ≤ <i>h</i> ≤ 10,<br>-10 ≤ <i>k</i> ≤ 10,<br>-14 ≤ <i>l</i> ≤ 15             |
| no. of rflns collected                                 | 3118                                                                           | 4294                                                                                                        | 3888                                                               | 1936                                                                  | 8580                                                                | 5581                                                                            |
| no. of indep rflns                                     | 2139 ( <i>R</i> <sub>int</sub> = 0.0166)                                       | 2937 ( <i>R</i> <sub>int</sub> = 0.0215)                                                                    | 1347 ( <i>R</i> <sub>int</sub> = 0.0351)                           | 1360 ( <i>R</i> <sub>int</sub> = 0.0207)                              | 3058 ( <i>R</i> <sub>int</sub> = 0.0243)                            | 953 ( <i>R</i> <sub>int</sub> = 0.0627)                                         |
| abs corr                                               | semiempirical                                                                  | semiempirical                                                                                               | semiempirical                                                      | semiempirical                                                         | semiempirical                                                       | Semiempirical                                                                   |
| refinement method                                      | full-matrix                                                                    | full-matrix                                                                                                 | full-matrix                                                        | full-matrix                                                           | full-matrix                                                         | full-matrix                                                                     |
|                                                        | least-squares on <i>F</i> <sup>2</sup>                                         | least-squares on <i>F</i> <sup>2</sup>                                                                      | least-squares on <i>F</i> <sup>2</sup>                             | least-squares on <i>F</i> <sup>2</sup>                                | least-squares on <i>F</i> <sup>2</sup>                              | least-squares on <i>F</i> <sup>2</sup>                                          |
| no. of data / restraints<br>/ params                   | 2139 / 0 / 154                                                                 | 2937 / 0 / 190                                                                                              | 1342 / 0 / 91                                                      | 1360 / 0 / 91                                                         | 3058 / 0 / 190                                                      | 953 / 0 / 75                                                                    |
| goodness-of-fit on <i>F</i> <sup>2</sup>               | 1.058                                                                          | 1.049                                                                                                       | 1.140                                                              | 1.069                                                                 | 1.026                                                               | 1.282                                                                           |
| final <i>R</i> indices<br>[ <i>I</i> > 2σ( <i>I</i> )] | <i>R</i> <sub>1</sub> = 0.0244, <i>wR</i> <sub>2</sub> =<br>0.0569             | <i>R</i> <sub>1</sub> = 0.0376, <i>wR</i> <sub>2</sub> =<br>0.0888                                          | <i>R</i> <sub>1</sub> = 0.0513, <i>wR</i> <sub>2</sub> =<br>0.1327 | <i>R</i> <sub>1</sub> = 0.0346, <i>wR</i> <sub>2</sub> = 0.<br>0.0814 | <i>R</i> <sub>1</sub> = 0.0242, <i>wR</i> <sub>2</sub> =<br>0.0560  | <i>R</i> <sub>1</sub> = 0.0665, <i>wR</i> <sub>2</sub> =<br>0.1297              |
| <i>R</i> indices (all data)                            | <i>R</i> <sub>1</sub> = 0.0260, <i>wR</i> <sub>2</sub> =<br>0.0578             | <i>R</i> <sub>1</sub> = 0.0478, <i>wR</i> <sub>2</sub> =<br>0.0934                                          | <i>R</i> <sub>1</sub> = 0.0546, <i>wR</i> <sub>2</sub> =<br>0.1348 | <i>R</i> <sub>1</sub> = 0.0398, <i>wR</i> <sub>2</sub> =<br>0.0833    | <i>R</i> <sub>1</sub> = 0.0278, <i>wR</i> <sub>2</sub> =<br>0.0576  | <i>R</i> <sub>1</sub> = 0.0777, <i>wR</i> <sub>2</sub> =<br>0.1345              |
| largest diff peak and<br>hole, e Å <sup>-3</sup>       | 0.731 and -0.491                                                               | 1.554 and -0.876                                                                                            | 1.203 and -0.823                                                   | 1.132 and -0.913                                                      | 0.644 and -0.434                                                    | 0.844 and -0.965                                                                |

### Computational details

The Gaussian-09 program was used to perform the DFT calculations on compounds **2**, **3**, and **5**.<sup>S5</sup> The geometry optimizations were performed on these compounds (**2**, **3**, and **5**) at B3LYP level of theory using LANL2DZ basis set for tin and germanium, and TZVP basis set for rest of the atoms (for coordinates of optimized geometries of these compounds, see the Appendix). The frequency calculations were carried out for on the optimized geometries of these compounds at the same level of theory to characterize the stationary points as minima. The input coordinates were taken from crystallographic information files (CIFs) of these compounds. The NBO analysis was performed on the optimized geometry of compound **2** at the same level of theory.<sup>S6</sup> The Chemcraft software was used for the graphical visualization of molecular orbitals ([www.chemcraftprog.com](http://www.chemcraftprog.com)).

### Coordinates of the optimized geometries of:

#### Compound 2

|    |              |              |              |
|----|--------------|--------------|--------------|
| Sn | -0.000028000 | 1.696350000  | -0.000066000 |
| S  | 0.933706000  | -0.084483000 | 1.742570000  |
| S  | -0.933563000 | -0.084810000 | -1.742465000 |
| O  | -2.020665000 | 1.028027000  | 0.780852000  |
| O  | 2.020569000  | 1.027886000  | -0.781089000 |
| N  | -2.644473000 | -0.069919000 | 0.363007000  |
| N  | 2.644433000  | -0.069965000 | -0.363064000 |
| C  | -3.666696000 | -0.527658000 | 1.130518000  |
| H  | -3.830411000 | 0.050743000  | 2.026322000  |
| C  | -4.404686000 | -1.620646000 | 0.756523000  |
| H  | -5.213076000 | -1.955513000 | 1.390574000  |
| C  | -3.037319000 | -1.804017000 | -1.202217000 |

|   |              |              |              |
|---|--------------|--------------|--------------|
| H | -2.759914000 | -2.290282000 | -2.126354000 |
| C | 4.083263000  | -2.272324000 | 0.439314000  |
| H | 4.647576000  | -3.136753000 | 0.763955000  |
| C | -2.280039000 | -0.684804000 | -0.811233000 |
| C | 2.280088000  | -0.684647000 | 0.811306000  |
| C | 3.037383000  | -1.803803000 | 1.202414000  |
| H | 2.760053000  | -2.289909000 | 2.126657000  |
| C | 3.666629000  | -0.527802000 | -1.130542000 |
| H | 3.830295000  | 0.050450000  | -2.026452000 |
| C | 4.404642000  | -1.620738000 | -0.756428000 |
| H | 5.213030000  | -1.955659000 | -1.390453000 |
| C | -4.083238000 | -2.272418000 | -0.439101000 |
| H | -4.647573000 | -3.136866000 | -0.763656000 |

Compound 3

|    |              |              |              |
|----|--------------|--------------|--------------|
| Sn | 1.670495000  | 0.114021000  | -0.436443000 |
| S  | -0.146138000 | 1.850180000  | 0.332365000  |
| Cl | 1.559667000  | -1.238127000 | 1.614003000  |
| N  | -1.314775000 | -0.422966000 | -0.574540000 |
| O  | -0.146148000 | -0.709442000 | -1.174698000 |
| C  | -1.477131000 | 0.740104000  | 0.132393000  |
| C  | -2.312143000 | -1.324972000 | -0.743587000 |
| H  | -2.025363000 | -2.197113000 | -1.309902000 |
| C  | -3.558212000 | -1.099969000 | -0.220611000 |
| H  | -4.334479000 | -1.837036000 | -0.366166000 |
| C  | -3.783445000 | 0.079726000  | 0.498079000  |
| H  | -4.755991000 | 0.283249000  | 0.926557000  |
| C  | -2.755068000 | 0.978531000  | 0.668097000  |
| H  | -2.896471000 | 1.890901000  | 1.228910000  |

## Compound 5

|    |              |              |              |
|----|--------------|--------------|--------------|
| Ge | -1.807671000 | 0.074012000  | -0.563144000 |
| S  | -0.199937000 | 1.841628000  | 0.090962000  |
| Cl | -1.861452000 | -1.012393000 | 1.483180000  |
| O  | -0.129900000 | -0.800709000 | -1.153428000 |
| N  | 1.023973000  | -0.469853000 | -0.537265000 |
| C  | 2.021404000  | -1.383462000 | -0.588773000 |
| H  | 1.752061000  | -2.307467000 | -1.075921000 |
| C  | 1.160315000  | 0.755366000  | 0.057231000  |
| C  | 3.451881000  | 0.144674000  | 0.553637000  |
| H  | 4.411432000  | 0.391931000  | 0.988298000  |
| C  | 2.419423000  | 1.054040000  | 0.604813000  |
| H  | 2.544013000  | 2.017168000  | 1.077770000  |
| C  | 3.250428000  | -1.101527000 | -0.052077000 |
| H  | 4.032333000  | -1.845274000 | -0.099706000 |

## References

1. G. R. Fulmer, A. J. M. Miller, N. H. Sherden, H. E. Gottlieb, A. Nudelman, B. M. Stoltz, J. E. Bercaw and K. I. Goldberg, *Organometallics*, 2010, **29**, 2176.
2. *SMART*: Bruker *Molecular Analysis Research Tool*, Version 5.618; Bruker AXS: Madison, WI, 2000.
3. *SAINTE-NT*, Version 6.04; Bruker AXS: Madison, WI, 2001.
4. *SHELXTL-NT*, Version 6.10; Bruker AXS: Madison, WI, 2000.
5. M. J. Frisch, G. W. Trucks, H. B. Schlegel, G. E. Scuseria, M. A. Robb, J. R. Cheeseman, G. Scalmani, V. Barone, B. Mennucci, G. A. Petersson, H. Nakatsuji, M. Caricato, X. Li, H. P. Hratchian, A. F. Izmaylov, J. Bloino, G. Zheng, J. L. Sonnenberg, M. Hada, M. Ehara, K. Toyota, R. Fukuda, J. Hasegawa, M. Ishida, T. Nakajima, Y. Honda, O. Kitao, H. Nakai, T. Vreven, J. A. Montgomery, Jr., J. E. Peralta, F. Ogliaro, M. Bearpark, J. J. Heyd, E. Brothers, K. N. Kudin, V. N. Staroverov, R. Kobayashi, J. Normand, K. Raghavachari, A. Rendell, J. C. Burant, S. S. Iyengar, J. Tomasi, M. Cossi, N. Rega, J. M. Millam, M. Klene, J. E. Knox, J. B. Cross, V. Bakken, C. Adamo, J. Jaramillo, R. Gomperts, R. E. Stratmann, O. Yazyev, A. J. Austin, R. Cammi, C. Pomelli, J. W. Ochterski, R. L. Martin, K. Morokuma, V. G. Zakrzewski, G. A. Voth, P. Salvador, J. J. Dannenberg, S. Dapprich, A. D. Daniels, Ö. Farkas, J. B. Foresman, J. V. Ortiz, J. Cioslowski, and D. J. Fox, *Gaussian 09, Revision C. 01*; Gaussian, Inc.: Wallingford, CT, 2010.
6. (a) A. E. Reed, L. A. Curtiss and F. Weinhold, *Chem. Rev.*, 1988, **88**, 899; (b) E. D. Glendening, A. E. Reed, J. E. Carpenter and F. Weinhold, *NBO*, Version 3.1; Theoretical Chemistry Institute, University of Wisconsin: Madison, 1996.
